# Supplementary material
Source: Springer Nature journal article supplement (https://www.springermedizin.de/resource/supplementary/12937_2013_762_MOESM2_ESM.pdf/25654026)

Palmitelaidic acid  
 Vaccenic acid  
 Myristelaidic acid  
 Caprylic acid  
 Capric acid  
 Lauric acid  
 Myristic acid  
 Pentadecanoic acid  
 Stearic acid  
 Palmitic acid  
 Margaric acid  
 Arachidic acid  
 Oleic acid  
 Eicosadienoic acid(20:2)  
 Palmitoleic acid  
 Arachidonic acid  
 Cervonic acid  
 Eicosatetraenoic acid  
 Gamma-linolenic acid  
 Linoleic acid

- Trans fatty acids
- Saturated fatty acids
- Poly unsaturated fatty acids
- Mon unsaturated fatty acids

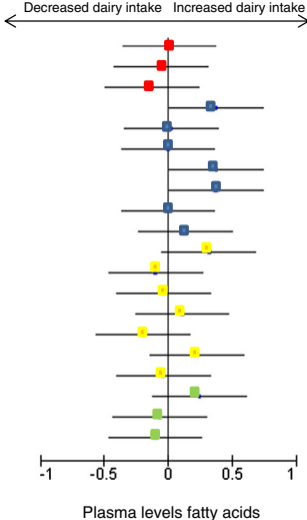

Supplement: MOESM2 [file 25654026]
